# Supplementary material for: “Come What May”: An Interpretative Phenomenological Analysis of Disaster Survivors’ Resilience and Meaning-Making of Fatalism
Source: Research Square preprint supplement (doi:10.21203/rs.3.rs-6317283/v1), 2025-05-09
Supplement: Supplementary file 1 [file ac1361db899e255afe1989cd.docx]

**Semi-Structured Interview Guide (English)**

| **Questions** | **Prompts** |
| --- | --- |
| 1. Can you tell me about a natural disaster that had a significant impact on your life? | - What happened? Where did it happen? How did you feel when it happened? - Did you hear news about the incoming disaster? What did you think? How did you feel? |
| 1. What were some of the challenges you faced during the disaster? | - What were you thinking during those challenges? How did you feel? - What was the most difficult challenge that you faced? Can you elaborate more on that? |
| 1. What did you think of the disaster that you experienced? | - Why do you think disasters happen? - Have you had any significant difficulties or losses because of the disaster? How did that experience affect you? - How did you cope with these difficulties or losses? Have you been able to recover from them? Can you tell me more about that? - Do you think you have been able to adapt after these difficulties? How were you able to overcome those difficulties? |
| 1. What were the most helpful for you in the process of coping, recovering, and adapting from the difficulties or losses that you faced because of the disaster? | - Did you have support from anyone that helped you prepare for the disaster? Can you tell me who they are? How did they help you? - Did you have any resources that helped you cope during the disaster? Can you tell me more about them? How did they help you? - Did you have any resources that helped you recover after the disaster? Do you think these resources can help prepare you in case the disaster happens again? |
| 1. Is there anything else you would like to add? |  |

**Semi-Structured Interview Guide (Filipino)**

| **Mga Katanungan** | **Mga Pang-udyok** |
| --- | --- |
| 1. Maaari ka bang magkwento tungkol sa isang natural na sakuna na nagkaroon ng malaking epekto sa buhay mo? | - Anong nangyari? Saan ito nangyari? Ano-ano ang mga naramdaman mo noon nangyari ito? - Nakarinig ka ba ng balita tungkol sa paparating na sakuna? Ano-ano ang mga nasa isip mo tungkol doon? Ano-ano ang mga naramdaman mo? |
| 1. Ano-ano ang ilan sa mga pagsubok na naranasan mo noong panahon ng sakuna? | - Ano-ano ang mga nasa isip mo noong mga pagsubok na iyon? Ano-ano ang mga naramdaman mo? - Ano ang pinakamahirap na pagsubok na iyong hinarap? Maaari ka bang magpaliwanag pa nang maigi tungkol diyan? |
| 1. Ano ang tingin mo sa sakunang naranasan mo? | - Ano sa palagay mo ang dahilan kung bakit nangyayari ang mga sakuna? - Nakaranas ka ba ng malaking paghihirap o kawalan dahil sa sakunang iyon? Paano nakaapekto sa iyo ang karanasang iyon? - Paano ka nag-*cope* sa mga paghihirap o kawalan na iyon? Naka-*recover* ka ba sa kanila? Maaari ka bang magkwento ng higit pa tungkol dito? - Sa tingin mo ba ay nakapag-*adapt* ka sa mga paghihirap o kawalan na ito? Paano mo nalampasan ang mga paghihirap na iyon? |
| 1. Ano-ano ang mga pinakanakatulong sa iyo sa pag-*cope*, pag-*recover*, at pag-*adapt* sa mga paghihirap at kawalang dinanas mo dahil sa sakuna? | - Nagkaroon ka ba ng anumang suporta mula sa kahit kanino para makapaghanda sa paparating na sakuna? Maaari mo bang tukuyin kung sino-sino ang mga ito? Paano ka nila natulungan? - Nagkaroon ka ba ng anumang *resources* na nakatulong sa iyong mag-*cope* sa sakuna? Maaari ka bang magkwento pa tungkol dito? Paano ka natulungan ng mga ito? - Nagkaroon ka ba ng anumang *resources* na nakatulong sa iyong mag-*recover* mula sa sakuna? Sa palagay mo ba ay makakatulong ang mga ito na ihanda ka sakaling mangyari uli ang sakuna? |
| 1. Mayroon ka bang nais idagdag? |  |
